# Supplementary material for: Diagnostics of COVID-19 based on CRISPR-Cas coupled to Isothermal Amplification: A Comparative Analysis and Update
Source: Preprints.org preprint supplement (doi:10.20944/preprints202203.0089.v1), 2022-03-07
Supplement: Supplementary file 1 [file Supplementary Table 1.xlsx]

## Sheet: CRISPR-CAS METHODS_SARS-COV-2
	GENERAL						EXPERIMENTAL OUTPUTS									STEP 1	SAMPLE COLLECTION		STEP 2 RNA PREPARATION	STEP 3	ISOTHERMAL AMPLIFICATION						STEP 4	CRISPR-CAS DETECTION					STEP 5	READ-OUT				EVALUATIONS
RANK	Title of the Reference	Name of Method	Acronym	CRISPR-Cas	Isothermal Method	Read-Out	Total time (min)	LoD (c/rx)	Vol Rx Cas (uL)	LoD (c/uL)	Specificity (%)	Sensitivity (%)	Num Clin Samp Tot	Num Positive Samples	Num Negative Samples	Clinical samples?	Clinical Sample	Used samples	RNA Preparation method	Targeted gene(s)	Isothermal Method	Origin components	Fabrication	Temp (°C)	Time (min)	One-pot	CRISPR-Cas	Temp (°C)	Time (min)	Cas Concentr (nM)	gRNA Concentr (nM)	RNP ratio	Read-Out	Probe(s)	Probe Conc (nM)	One-pot	Portable/Lab-based	Rank Total Time	Total Time %	Rank LoD	LoD %	Rank Specificity	Specificity %	Rank Sensitivity	Sensitivity %	Total %	Final RANK
1	Digital CRISPR/Cas-Assisted Assay for Rapid and Sensitive Detection of SARS-CoV-2	Digitization-Enhanced CRISPR/Cas-Assisted One-Pot Virus detection	deCOViD	LbCas12a	RT-RPA	Fluorescence	15	15	15	1	100	100	4	2	2	Yes	Nasopharyngeal swabs	Nasopharyngeal swabs. Synthetic RNA	release	ORF 1ab, E, N	RT-RPA	Commercial	TwistDx	42	15	Yes	LbCas12a	RT	15	640	640	1	Fluorescence	Alex647N-TTATT-IAbRQSp	4000	Yes	Portable	13	100	15	71.4286	10	100	13	100	371.429	1
2	Development and evaluation of a rapid CRISPR-based diagnostic for COVID-19	CRISPR-based Diagnostic for COVID-19	CRISPR-COVID	Cas13a	RT-RPA	Fluorescence	40	2.5	25	0.1	100	100	114	61	53	Yes	Nasopharyngeal swab and bronchoalveolar lavage fluid specimen	Nasopharyngeal swab and bronchoalveolar lavage fluid specimen. Synthetic DNA.	extraction	Orf1ab, N	RT-RPA	NR	NR	42	30	Not	Cas13a	42	10	66.7	33.3	2.003	Fluorescence	5´-6-FAM-UUUUUC-BHQ	166	Not	Lab	6	46.1538	20	95.2381	10	100	13	100	341.392	2
3	Ultrasensitive and visual detection of SARS-CoV-2 using all-in-one dual CRISPR-Cas12a assay	All-In-One Dual CRISPR-Cas12a Assay	AIOD-CRISPR	LbCas12a	RT-RPA	Fluorescence	40	5	25	0.2	100	100	28	8	20	Yes	Nasopharyngeal swabs	Synt DNA, clinical swab samples (28 tot, 8+)	extraction	N (28857-28977) 121bp	RT-RPA	Commercial	TwistDx	37	40	Yes	LbCas12a	37	40	76.8	38.4	2	Fluorescence	5′-6-FAM-TTATT-Iowa Black	400	Yes	Portable	6	46.1538	18	85.7143	10	100	13	100	331.868	3
4	Fluorescence polarization system for rapid COVID-19 diagnosis	CRISPR Optical Detection of Anisotropy	CODA	LbCas12a	RT-RPA	Fluorescence anisotropy	20	150	50	3	100	100	20	10	10	Yes	Nasopharyngeal swabs	Synt RNA, RNA extrated from patient swab samples	extraction	N1, N2, RP30 (internal control)	RT-RPA	Commercial	Bioneer	42	20	Yes	LbCas12a	42	20	640	160	4	Fluorescence anisotropy	FAM-TATTATTAT (fluorescence anisotropy detected, not quencher needed)	100	Yes	Portable	12	92.3077	7	33.3333	10	100	13	100	325.641	4
5	opvCRISPR- One-pot visual RT-LAMP-CRISPR platform for SARS-cov-2 detection	One-Pot Visual RT-LAMP-CRISPR	opvCRISPR	LbCas12a	RT-LAMP	Fluorescence	45	5	60	0.08	100	100	26	NR	NR	Yes	Nasopharyngeal swabs	RNA Nasopharyngeal swab samples	NR	N, S,	RT-LAMP	Commercial	NEB	65	40	Not	LbCas12a	37	5	200	600	0.333333	Fluorescence	NR	2000	Not	Lab	5	38.4615	18	85.7143	10	100	13	100	324.176	5
6	Rapid, Ultrasensitive, and Highly Specific Diagnosis of COVID-19 by CRISPR-Based Detection	Multiple Cross Displacement Amplification with CRISPR-Cas12a-based Detection	COVID-19 MCCD	LbCas12a	RT-MCDA	Lateral Flow Strip	45	7	20	0.35	100	100	114	37	77	Yes	respiratory swab samples	NP swab samples	NR	ORF1ab, N	RT-MCDA	Commercial	HuiDeXing Biotech	63	35	Not	LbCas12a	37	5	75	100	0.75	Lateral Flow Strip	5’-FAM-TTATTATTATT-BHQ−3′	10000	Not	Portable	5	38.4615	17	80.9524	10	100	13	100	319.414	6
7	Rapid and sensitive detection of COVID-19 using CRISPR/Cas12a-based detection with naked eye readout, CRISPR/Cas12a-NER	CRISPR/Cas12a-based Detection with Naked Eye Readout	CRISPR/Cas12a-NER	LbCas12a	RT-RAA	Fluorescence	45	10	20	0.5	100	100	31	16	15	Yes	Nasopharyngeal swab	Synt RNA and RNA extracted NP swabs	extraction	orf1a, orf1b, N, E	RT-RAA	Commercial	Qitian Biological Co., Ltd., Jiangsu, China	39	30	Not	LbCas12a	37	15	70	1000	0.07	Fluorescence	NR	0.025 (suspect is pmol, not pM)	Not	Portable	5	38.4615	16	76.1905	10	100	13	100	314.652	7
8	Contamination-free visual detection of SARS-CoV-2 with CRISPR/Cas12a- A promising method in the point-of-care detection	NA	NA	LbCas12a	RT-LAMP	Fluorescence	45	20	45	0.45	100	100	10	7	3	Yes	respiratory swabs	Synt RNA, RNA extrated from patient respiratory swab samples (7+, 3-)	NR	ORF, N, E	RT-LAMP	Commercial	NEB	65	40	Not	LbCas12a	37	5	88.8	266	0.333835	Fluorescence	5′-6FAM 3′ -BHQ1	2500	Not	Portable	5	38.4615	14	66.6667	10	100	13	100	305.128	8
9	Autonomous lab-on-paper for multiplexed, CRISPR-based diagnostics of SARS-CoV-2	Autonomous lab-on-paper platform	NA	LbCas12a	RT-RPA	Fluorescence	40	100	25	4	100	100	21	8	13	Yes	Nasopharyngeal swabs	swab clinical samples (tot 21, 8+)	extraction	N, S, RNAse P (internal control)	RT-RPA	Commercial	TwistDx	37	15	Not	LbCas12a	37	25	100	62.5	1.6	Fluorescence	NR	50	Not	Portable	6	46.1538	10	47.619	10	100	13	100	293.773	9
10	Point-of-care testing for COVID-19 using SHERLOCK diagnostics	SHERLOCK Testing in One Pot	STOPCovid	AapCas12b	RT-LAMP	Fluorescence / Lateral Flow Strip	40	100	50	2	100	100	17	12	5	Yes	Nasopharyngeal swabs	Nasopharyngeal extracts	release	N	RT-LAMP	Commercial	NEB	60	40	Yes	AapCas12b	70	40	500	500	1	Fluorescence / Lateral Flow Strip	/56-FAM/TTTTTTT/3Biotin/	125	Yes	Portable	6	46.1538	10	47.619	10	100	13	100	293.773	10
11	iSCAN- An RT-LAMP-coupled CRISPR-Cas12 module for rapid, sensitive detection of SARS-CoV-2	in vitro Specific CRISPR-based Assay for Nucleic Acids Detection	iSCAN	LbCas12a, AacCas12b, AapCas12b	RT-LAMP	Fluorescence / Lateral Flow Strip	60	10	55	0.18	100	100	7	5	2	Yes	Nasopharyngeal swabs	Synthetic RNA and RNA samples extracted from nasopharyngeal swabs	extraction	N, E	RT-LAMP	Made by them	Made by them	62	60	Yes	LbCas12a, AacCas12b, AapCas12b	62	60	250	250	1	Fluorescence / Lateral Flow Strip	5′-​/56-FAM/TTATT/3IABKFQ/​-3′​	500	Yes	Portable	2	15.3846	16	76.1905	10	100	13	100	291.575	11
12	MeCas12a, a Highly Sensitive and Specific System for COVID-19 Detection	Manganese-enhanced Cas12a	MeCas12a	LbCas12a, AsCas12a	RT-RAA	Fluorescence	45	100	20	5	100	100	24	13	11	Yes	Nasopharyngeal swabs	RNA Nasopharyngeal swab and saliva samples	extraction	E, N	RT-RAA	Commercial	Qitian Biological Co., Ltd., Jiangsu, China	39	30	Not	LbCas12a, AsCas12a	37	15	70	1000	0.07	Fluorescence	NR	0.025 (suspect is pmol, not pM)	Not	Lab	5	38.4615	10	47.619	10	100	13	100	286.081	12
13	Vigilant- An Engineered VirD2-Cas9 Complex for Lateral Flow Assay-Based Detection of SARS-CoV2	VirD2-dCas9 Guided and LFA-coupled Nucleic Acid Test	VIGILANT	SpCas9	RT-RPA	Lateral Flow Strip	36	112	45	2.5	100	96.4	60	56	4	Yes	patient samples	synthetic SARS-CoV2 RNA, RNA from patient samples (26+, 4-)	extraction	N	RT-RPA	Commercial	TwistDx	42	25	Not	SpCas9	37 & 60	11	250	250	1	Lateral Flow Strip	NR	NA	Not	Portable	7	53.8462	9	42.8571	10	100	11	84.6154	281.319	13
14	Clinical validation of a Cas13-based assay for the detection of SARS-CoV-2 RNA	SHERLOCK	SHERLOCK	LwaCas13a	RT-RPA	Fluorescence / Lateral Flow Strip	55	42	34.37	2.2	100	100	534	81	380	Yes	Nasopharyngeal and throat swab samples, RNA from pre-operative samples from patients undergoing surgery	nasopharyngeal and throat swab samples (tot 154), RNA from pre-operative samples from patients undergoing surgery (380)	extraction	S, N, Orf1ab	RT-RPA	Commercial	TwistDx	42	25	Not	LwaCas13a	37	30	46.5	28.3	1.64311	Fluorescence / Lateral Flow Strip	Fluorescein-Biotin	1060	Not	Portable	3	23.0769	12	57.1429	10	100	13	100	280.22	14
15	Intrinsic signal amplification by type III CRISPR-Cas systems provides a sequence-specific SARS-CoV-2 diagnostic	CRISPR-Csm-based Detection of SARS-CoV-2	NA	Cas10	RT-LAMP	Fluorescence / colorimetric	30	5000	25	200	100	100	56	46	10	Yes	Nasopharyngeal swabs	RNA samples extracted from nasopharyngeal swabs	extraction	N1, ORF3	RT-LAMP	Commercial	NEB	65	29	Not	Cas10	55	1	200	200	1	Fluorescence / colorimetric	56-FAM-rCrUrCrUrCrU-3IABkFQ	500	Not	Lab	9	69.2308	1	4.7619	10	100	13	100	273.993	15
16	Electric field-driven microfluidics for rapid CRISPR-based diagnostics and its application to detection of SARS-CoV-2	Isotachophoresis-mediated CRISPR–Cas12 DNA Detection	ITP-CRISPR assay	LbCas12a	RT-LAMP	Fluorescence	25	200	20	10	100	93.8	64	NR	NR	Yes	Nasopharyngeal swabs	Nasopharyngeal swab	extraction	N, E, RNase P (control)	RT-LAMP	Commercial	NEB	62	20	Not	LbCas12a	37	5	100	125	0.8	Fluorescence	56-FAM-TTATT-IABkFQ	250	Not	Lab	11	84.6154	6	28.5714	10	100	7	53.8462	267.033	16
17	A Saliva-Based RNA Extraction-Free Workflow Integrated With Cas13a for SARS-CoV-2 Detection	Cas13 Assisted Saliva-based & Smartphone Integrated Testing	CASSPIT	LwaCas13a	RT-RPA	Fluorescence / Lateral Flow Strip	45	100	20	5	100	95.7	76	47	29	Yes	Saliva	Synthetic DNA & RNA, RNA spiked in saliva, Saliva clinical samples (Tot105, 76+, 29-)	release	S, N, ORF1ab	RT-RPA	Commercial	TwistDx	42	25	Not	LwaCas13a	37	20	2.2	NR	NR	Fluorescence / Lateral Flow Strip		1000	Not	Portable	5	38.4615	10	47.619	10	100	10	76.9231	263.004	17
18	An engineered CRISPR-Cas12a variant and DNA-RNA hybrid guides enable robust and rapid COVID-19 testing	Variant Nucleotide Guard	VaNGuard	LbCas12a / AsCas12a / enAsCas12a (clin)	RT-LAMP	Fluorescence / Lateral Flow Strip	27	50	75	2	100	82	129	72	57	Yes	Nasopharyngeal swabs	Synthetic DNA/ Synthetic RNA / inactivated SARS-CoV2 / Patient nasopharyngeal swab samples(Tot129, 72+, 57-)	extraction / release	ORF1AB, S, and N	RT-LAMP	Commercial	NEB	65	22	Not	LbCas12a / AsCas12a / enAsCas12a (clin)	60	5	65	NR	NR	Fluorescence / Lateral Flow Strip	Cy5/FAM-Quencher & FITC-biotin	200 (F) / 90 (LF)	Not	Portable	10	76.9231	11	52.381	10	100	2	15.3846	244.689	18
19	Ultra-sensitive and high-throughput CRISPR-powered COVID-19 diagnosis	CRISPR-powered COVID-19 Diagnosis and CRISPR-based Fluorescent Detection System	CRISPR-FDS	LbCas12a	RT-RPA	Fluorescence	40	5	30	0.17	71.4	100	29	19	10	Yes	nasal swabs	clinical nasal swab samples (29tot, 19+)	extraction	N, Orf1a	RT-RPA	Commercial	TwistDx	42	20	Not	LbCas12a	37	20	33.3	30	1.11	Fluorescence	NR	667	Not	Lab	6	46.1538	18	85.7143	1	10	13	100	241.868	19
20	Detection and Differentiation of SARS-CoV-2, Influenza, and Respiratory Syncytial Viruses by CRISPR	NA	NA	LbCas12a	RT-RPA	Fluorescence	45	20	20	1	100	90	22	10	12	Yes	Nasopharyngeal swabs	RNA extracted from culture cells and Nasopharyngeal swab	extraction	N	RT-RPA	Commercial	TwistDx	42	15	Not	LbCas12a	42	30	640	640	1	Fluorescence	NR	375	Not	Lab	5	38.4615	14	66.6667	10	100	4	30.7692	235.897	20
21	Rapid, Sensitive, and Specific Severe Acute Respiratory Syndrome Coronavirus 2 Detection- A Multicenter Comparison Between Standard Quantitative Reverse-Transcriptase Polymerase Chain Reaction and CRISPR-Based DETECTR	DNA Endonuclease Targeted CRISPR Trans Reporter	DETECTR	LbCas12a	RT-LAMP	Fluorescence / Lateral Flow Strip	35	50	25	2	93	95.3	378	155	223	Yes	Nasopharyngeal swabs, broncheoalvealar lavage or sputum swabs	NP swab samples	NR	N	RT-LAMP	Commercial	NEB	62	20	Not	LbCas12a	37	15	50	62.5	0.8	Fluorescence / Lateral Flow Strip	NR	100 (F), 500 (LF)	Not	Portable	8	61.5385	11	52.381	5	50	9	69.2308	233.15	21
22	SARS-CoV-2 Direct Detection Without RNA Isolation With Loop-Mediated Isothermal Amplification (LAMP) and CRISPR-Cas12	NA	NA	LbCas12a	RT-LAMP	Fluorescence	50	352	22	16	99.4	98	34	NR	NR	Yes	nasal swabs and saliva samples	NP swab samples	release	N	RT-LAMP	Commercial	NEB	65	40	Not	LbCas12a	37	10	50	62.5	0.8	Fluorescence	Taqman probe: 5′FAM/3′BHQ1	500	Not	Portable	4	30.7692	4	19.0476	9	90	12	92.3077	232.125	22
23	A one-step, one-pot CRISPR nucleic acid detection platform (CRISPR-top)- Application for the diagnosis of COVID-19	CRISPR-mediated Testing in One-Pot	CRISPR-top	AapCas12b	RT-LAMP	Fluorescence / Lateral Flow Strip	40	10	25	0.4	100	73	132	52	80	Yes	pharyngeal, nasal, anal swabs as well as fecal and sputum	Synt DNA, patient pharyngeal, nasal, anal swabs as well as fecal and sputum samples (Tot52+), 80- pharyngeal swabs samples validate specificity of method	extraction	ORF1ab, N	RT-LAMP	Commercial	HuiDeXin Biotech	59	40	Yes	AapCas12b	59	40	16	24	0.666667	Fluorescence / Lateral Flow Strip	FAM-BHQ1 & FAM-Biotin	2000	Yes	Portable	6	46.1538	16	76.1905	10	100	1	7.69231	230.037	23
24	Integrated sample inactivation, amplification, and Cas13-based detection of SARS-CoV-2	SHERLOCK and HUDSON Integration to Navigate Epidemics)	SHINE	LwaCas13a	RT-RPA	Fluorescence / Lateral Flow Strip	30	200	20	10	100	90	50	NR	NR	Yes	Clinical samples	NP swab and saliva samples	release	Orf1ab, N1 (Control)	RT-RPA	Commercial	TwistDx	37	30	Yes	LwaCas13a	37	30	45	22.5	2	Fluorescence / Lateral Flow Strip	polyU FAM-Quencher & biotinylated FAM	62.5 (F) / 1000 (LF)	Yes	Lab	9	69.2308	6	28.5714	10	100	4	30.7692	228.571	24
25	CRISPR–Cas12-based detection of SARS-CoV-2	DNA Endonuclease Targeted CRISPR Trans Reporter	DETECTR	LbCas12a	RT-LAMP	Fluorescence / Lateral Flow Strip	40	500	100	100	100	95	83	41	42	Yes	naso-oro pharyngeal swabs	Synt RNA and RNA extracted from naso-oro pharyngeal swab samples	extraction	E, N	RT-LAMP	Commercial	NEB	62	30	Not	LbCas12a	37	10	50	62.5	0.8	Fluorescence / Lateral Flow Strip	56-FAM/TTATTATT/3Biotin	500	Not	Portable	6	46.1538	3	14.2857	10	100	8	61.5385	221.978	25
26	Evaluation of a Lyophilized CRISPR-Cas12 Assay for a Sensitive, Specific, and Rapid Detection of SARS-CoV-2	Lyophilized CRISPR-Cas12 Assay	Lyo-CRISPR SARS-CoV-2 Kit	LbCas12a	RT-LAMP	Fluorescence	60	300	40	7.5	99.04	100	210	105	105	Yes	Nasopharyngeal swabs	RNA samples extracted from nasopharyngeal swabs	extraction / release	N, RNAse P (internal control)	RT-LAMP	Commercial	CASPR Biotech	62	40	Not	LbCas12a	37	20	NR	NR	NR	Fluorescence	NR	NA	Not	Portable	2	15.3846	5	23.8095	8	80	13	100	219.194	26
27	Development of a Broadly Applicable Cas12a-Linked Beam Unlocking Reaction for Sensitive and Specific Detection o f Respiratory Pathogens Including SARS-CoV-2	Cas12a-linked Beam Unlocking Reaction	CALIBURN	LbCas12a	RT-RPA	Fluorescence	60	2.5	20	0.25	100	73	18	18	0	Yes	Nasal swab, oropharyngeal swab, anal swab, sputum, stool, and sputum supernatant	Nasal swab, oropharyngeal swab, anal swab, sputum, stool, and sputum supernatant	extraction	ORF1ab, S, E, M, N	RT-RPA	Commercial	Qitian Gene Biotech, Wuxi, Jiangsu, China	42	30	Not	LbCas12a	37	30	NR	100	NR	Fluorescence	FAM-BQ1	1250	Not	Lab	2	15.3846	20	95.2381	10	100	1	7.69231	218.315	27
28	Detection of SARS-CoV-2 with SHERLOCK One-Pot Testing	SHERLOCK Testing in One Pot	STOPCovid.v2	AapCas12b	RT-LAMP	Fluorescence / Lateral Flow Strip	45	33	10	3.3	98.5	93.1	402	202	200	Yes	Nasopharyngeal and anterior nasal swab samples	Nasopharyngeal and anterior nasal swab samples	extraction	ORF1ab, N, S	RT-LAMP	Commercial	NEB	60	45	Yes	AapCas12b	60	45	31.25	31.25	1	Fluorescence / Lateral Flow Strip	56-FAM/TTATTATT/3Biotin & 5′/5HEX/TTTTT/3IABkFQ/3′	250	Yes	Portable	5	38.4615	13	61.9048	7	70	5	38.4615	208.828	28
29	Streamlined inactivation, amplification, and Cas13-based detection of SARS-CoV-2	Streamlined Highlighting of Infections to Navigate Epidemics	SHINE	LwaCas13a	RT-RPA	Fluorescence / Lateral Flow Strip	40	200	20	10	100	90	50	30	20	Yes	nasal swabs and saliva	cutivated virus, nasal swab or combined nasal and saliva samples	extraction / release	ORF1a	RT-RPA	Commercial	TwistDx	41	40	Yes	LwaCas13a	37	40	45	22.5	2	Fluorescence / Lateral Flow Strip	FAM quenched polyU (6U or 7U ONE-STEP) & FAM-Biotin FAM 1 μM	125 (F, one-step), 62.5 (F), 1000 (LF)	Yes	Portable	6	46.1538	6	28.5714	10	100	4	30.7692	205.495	29
30	Rapid and Accurate Detection of Novel Coronavirus SARS-CoV-2 Using CRISPR-Cas3	Cas3-operated Nucleic Acid Detection	CONAN	Cas3 + multiprotein Cas complex (Cascade) from E. coli	RT-LAMP	Fluorescence / Lateral Flow Strip	40	100	20	5	95	90	25	10	15	Yes	Nasopharyngeal and oropharyngeal swabs	Nasopharyngeal and oropharyngeal swabs	extraction	N1, N2	RT-LAMP	Commercial	NEB	62	30	Not	Cas3 + multiprotein Cas complex (Cascade) from E. coli	37	10	100	62.5	1.6	Fluorescence / Lateral Flow Strip	5'-/5HEX/AAGGTCGGA/ZEN/GTCAACGGATTTGGTC/3IBIFQ/-3'	250	Not	Portable	6	46.1538	10	47.619	6	60	4	30.7692	184.542	30
31	Enhancement of trans-cleavage activity of Cas12a with engineered crRNA enables amplified nucleic acid detection	ENHanced Analysis of Nucleic acids with CrRNA Extensions	CRISPR-ENHANCE	LbCas12a	RT-LAMP	Fluorescence / Lateral Flow Strip	35	3	50	0.06	NA	NA	NA	NA	NA	Not	NA	Synthetic dsDNA	NA	N	RT-LAMP	Commercial	NEB	63	20	Not	LbCas12a	25	15	60	120	0.5	Fluorescence / Lateral Flow Strip	FAM-3IABkFQ	500	Not	Portable	8	61.5385	19	90.4762	0	0	0	0	152.015	31
32	Sensitive quantitative detection of SARS-CoV-2 in clinical samples using digital warm-start CRISPR assay	Digital Warm-Start CRISPR Assay	dWS-CRISPR	AsCas12a	RT-DAMP	Fluorescence	90	NR	NR	5	85	100	35	13	19	Yes	(nasopharyngeal) swabs and saliva	Swab and saliva samples. It does not say whether the swabs are nasopharyngeal	extraction / release	N (28769-28941 in genome)	RT-DAMP	Commercial	NEB	52	90	Yes	AsCas12a	52	90	85.3	80	1.06625	Fluorescence	5'- FAM/CCCCC/IowaBlack-3'	8330	Yes	Lab	1	7.69231	0	0	3	30	13	100	137.692	32
33	Machine Learning-Driven and Smartphone-Based Fluorescence Detection for CRISPR Diagnostic of SARS-CoV-2	Machine Learning-Driven and Smartphone-Based Fluorescence Detection for CRISPR	NA	LbCas12a	RT-RPA	Fluorescence	60	125	20	6.25	92	87	7	5	2	Yes	Nasopharyngeal swabs	RNA samples extracted from nasopharyngeal swabs	extraction	N	RT-RPA	Commercial	TwistDx	39	30	Not	LbCas12a	39	30	1000	300	3.33333	Fluorescence	5′ 6-FAM/3′ BHQ-1	500	Not	Portable	2	15.3846	8	38.0952	4	40	3	23.0769	116.557	33
34	Rapid and Sensitive Detection of SARS-CoV-2 Using Clustered Regularly Interspaced Short Palindromic Repeats.pdf	NA	NA	LbCas12a	RT-RPA	Fluorescence / Lateral Flow Strip	60	2	20	0.1	NR	NR	22	0	22	Not	Nasopharyngeal swabs	genomic RNA of cells infected	release	M, N, S	RT-RPA	Commercial	TwistDx	42	30	Not	LbCas12a	42	30	640	640	1	Fluorescence / Lateral Flow Strip	GoTaq® Probe One-Step RT-PCR System	800	Not	Portable	2	15.3846	21	100	0	0	0	0	115.385	34
35	Detection of the SARS-CoV-2 D614G mutation using engineered Cas12a guide RNA	Synthetic Mismatch Integrated crRNA Guided Cas12a Detection	symRNA-Cas12a	LbCas12a	RT-RPA	Fluorescence	45	10	20	0.5	NR	NR	30	NR	NR	Yes	Clinical samples	Clinical samples. E and S gene fragments were transcribed IVT.	extraction	E, S	RT-RPA	Commercial	TwistDx	42	30	Not	LbCas12a	37	15	70	1000	0.07	Fluorescence	NR	0.025	Not	Lab	5	38.4615	16	76.1905	0	0	0	0	114.652	35
36	Comparative performance of CRISPR-Cas12a assays for SARS-CoV-2 detection tested with RNA extracted from clinical specimens	Comparison of several methods	NA	LbCas12a	RT-RPA	Fluorescence	45	NR	15	NR	84.1	93.2	107	107	107	Yes	Nasopharyngeal and/or throat swabs	Nasopharyngeal and/or throat swab samples	extraction	E, S, N1, N2	RT-RPA	Commercial	TwistDx	39	30	Not	LbCas12a	39	15	330	30	11	Fluorescence	5' 6-FAM-3' BHQ-1	200	Not	Portable	5	38.4615	0	0	2	20	6	46.1538	104.615	36
37	A protocol for rapid detection of the 2019 novel coronavirus SARS-CoV-2 using CRISPR diagnostics- SARS-CoV-2 DETECTR (Rapid Detection of 2019 Novel Coronavirus SARS-CoV-2 Using a CRISPR-based DETECTR Lateral Flow Assay)	DNA Endonuclease Targeted CRISPR Trans Reporter	DETECTR	LbCas12a	RT-LAMP	Fluorescence / Lateral Flow Strip	30	1400	20	70	NA	NA	NA	NA	NA	Not	NA	This is a protocol that assumes you have extracted the RNA from a patient	NA	N, E, RNase P (human sample control)	RT-LAMP	Commercial	NEB	62	20	Not	LbCas12a	37	10	50	62.5	0.8	Fluorescence / Lateral Flow Strip	/56-FAM/ TTATTATT/3Bio/	500	Not	Portable	9	69.2308	2	9.52381	0	0	0	0	78.7546	37
38	SARS-CoV-2 detection with CRISPR diagnostics	CRISPR-assisted Detection	CASDetec	AapCas12b	RT-RAA	Fluorescence	40	200	20	10	NA	NA	NA	NA	NA	Not	NA	Harvested lentivirus samples	extraction / release	RdRp	RT-RAA	Commercial	Hangzhou ZC Bio-Sci&Tech Co	42	30	Not	AapCas12b	42	10	30	108	0.277778	Fluorescence	poly-T fluorescence-quenchers of varying nucleotide lengths	200	Not	Lab	6	46.1538	6	28.5714	0	0	0	0	74.7253	38
39	CRISPR-based surveillance for COVID-19 using genomically-comprehensive machine learning design	Specific High Sensitivity Enzymatic Reporter UnLOCKing	SHERLOCK	LwaCas13a	RT-RPA	Fluorescence / Lateral Flow Strip	50	200	20	10	NR	NR	NR	NR	NR	Yes	NR	Synt DNA & RNA. RNA extrated from patient samples	NR	ORF	RT-RPA	Commercial	TwistDx	41	20	Not	LwaCas13a	37	30	350	20	17.5	Fluorescence / Lateral Flow Strip	56-FAM 3Bio	126 (F), 1000 (LF)	Not	Portable	4	30.7692	6	28.5714	0	0	0	0	59.3407	39
40	A protocol for detection of COVID-19 using CRISPR diagnostics	Specific High Sensitivity Enzymatic Reporter UnLOCKing	SHERLOCK	LwaCas13a	RT-RPA	Fluorescence / Lateral Flow Strip	55	200	20	10	NA	NA	NA	NA	NA	Not	NA	Synthetic RNA	NA	S, Orf1ab	RT-RPA	Commercial	TwistDx	42	25	Not	LwaCas13a	37	30	44	24.2	1.81818	Fluorescence / Lateral Flow Strip	FAM-Bio (14 nt)	1000	Not	Portable	3	23.0769	6	28.5714	0	0	0	0	51.6484	40
41	Rapid, field-deployable nucleobase detection and identification using FnCas9	FnCas9 Editor Linked Uniform Detection Assay	FELUDA	FnCas9	RT-RPA	Lateral Flow Strip / Gel	35	NR	NR	NR	NA	NA	NA	NA	NA	Not	blood	DNA	extraction	NR	RT-RPA	Commercial	TwistDx	39	20	Not	FnCas9	37	15	500	500	1	Lateral Flow Strip / Gel	NR	NA	Not	Portable	4	30.7692	0	0	0	0	0	0	30.7692	41
42	An ultrasensitive, rapid, and portable coronavirus SARS-CoV-2 sequence detection method based on CRISPR-Cas12	NA	NA	LbCas12a	RT-RPA	Fluorescence / Lateral Flow Strip	60	NR	NR	10	NA	NA	3	NA	NA	Not	NA	Synthetic RNA, Synt RNA spiked in saliva samples	release	RdRp, ORF1b and ORF1ab	RT-RPA	Commercial	TwistDx	42	30	Not	LbCas12a	37	30	37	37	1	Fluorescence / Lateral Flow Strip	FAM-Quencher / FAM-Biotin	1000	Not	Portable	2	15.3846	0	0	0	0	0	0	15.3846	42
NR	Not Reported
NA	Not Applicable
RT	Room Temperature
F	Fluorescence
LF	Lateral Flow assay
